# Supplementary material for: Invasion at the Edge: The Case of Rosa rugosa (Rosaceae) in Italy
Source: MDPI journal article supplement (doi:10.3390/d13120645), 2021-12-04
Supplement: s1 [file s1]

**Table S1.** List of collected plant species. Species names, average percent cover within the vegetation layer (H = Herbaceous, S = Shrub, and T = Tree), and frequencies over the 11 sampled plots.

| Species                                              | H%  | S%  | T% | Freq. | Species                                                   | H%  | S% | T% | Freq. |
|------------------------------------------------------|-----|-----|----|-------|-----------------------------------------------------------|-----|----|----|-------|
| <i>Ambrosia psilostachya</i> DC.                     | 9   | -   | -  | 91%   | <i>Medicago littoralis</i> Rohde ex Loisel.               | < 1 | -  | -  | 18%   |
| <i>Ammophila arenaria</i> (Mabille) Laínz            | 2   | -   | -  | 73%   | <i>Oenothera biennis</i> L.                               | 4   | -  | -  | 100%  |
| <i>Amorpha fruticosa</i> L.                          | 2   | 8   | -  | 100%  | <i>Osyris alba</i> L.                                     | < 1 | -  | -  | 9%    |
| <i>Aristolochia rotunda</i> L.                       | < 1 | -   | -  | 55%   | <i>Petrorhagia saxifraga</i> (L.) Link                    | < 1 | -  | -  | 45%   |
| <i>Artemisia vulgaris</i> L.                         | 1   | -   | -  | 9%    | <i>Phleum arenarium</i> L.                                | < 1 | -  | -  | 91%   |
| <i>Arundo donax</i> L.                               | -   | 1   | -  | 18%   | <i>Picris hieracioides</i> L.                             | < 1 | -  | -  | 9%    |
| <i>Asparagus acutifolius</i> L.                      | < 1 | 1   | -  | 27%   | <i>Pinus pinaster</i> Aiton                               | -   | 23 | 34 | 27%   |
| <i>Asparagus officinalis</i> L.                      | < 1 | -   | -  | 18%   | <i>Pinus pinea</i> L.                                     | < 1 | 14 | 57 | 45%   |
| <i>Brachypodium rupestre</i> (Host) Roem. et Schult. | < 1 | -   | -  | 27%   | <i>Plantago lanceolata</i> L.                             | < 1 | -  | -  | 18%   |
| <i>Calamagrostis epigejos</i> (L.) Roth              | 1   | -   | -  | 64%   | <i>Populus nigra</i> L.                                   | < 1 | 5  | -  | 55%   |
| <i>Calystegia soldanella</i> (L.) R. Br.             | < 1 | -   | -  | 9%    | <i>Prunus persica</i> (L.) Batsch                         | < 1 | 1  | -  | 18%   |
| <i>Carex</i> sp                                      | 8   | -   | -  | 27%   | <i>Prunus spinosa</i> L.                                  | -   | 1  | -  | 9%    |
| <i>Catapodium rigidum</i> (L.) C.E. Hubb.            | < 1 | -   | -  | 81%   | <i>Pyrus communis</i> L.                                  | -   | 3  | -  | 9%    |
| <i>Cephalanthera longifolia</i> (L.) Fritsch         | < 1 | -   | -  | 9%    | <i>Quercus ilex</i> L.                                    | < 1 | 1  | -  | 27%   |
| <i>Crataegus monogyna</i> Jacq.                      | 3   | -   | -  | 18%   | <i>Quercus robur</i> L.                                   | < 1 | -  | -  | 45%   |
| <i>Crepis foetida</i> L.                             | 1   | -   | -  | 55%   | <i>Rosa rugosa</i> Thunb.                                 | 16  | 3  | -  | 100%  |
| <i>Cynodon dactylon</i> (L.) Pers.                   | 1   | -   | -  | 45%   | <i>Rubia peregrina</i> L.                                 | < 1 | -  | -  | 45%   |
| <i>Cyperus capitatus</i> Vand.                       | 1   | -   | -  | 73%   | <i>Rubus canescens</i> DC.                                | 1   | 1  | -  | 64%   |
| <i>Dactylis glomerata</i> L.                         | 5   | -   | -  | 73%   | <i>Salix</i> sp                                           | -   | 2  | -  | 18%   |
| <i>Echinophora spinosa</i> L.                        | 1   | -   | -  | 36%   | <i>Sanguisorba minor</i> Scop.                            | 2   | -  | -  | 73%   |
| <i>Elymus acutus</i> (DC.) M.-A. Thiébaud            | < 1 | -   | -  | 9%    | <i>Scabiosa columbaria</i> L.                             | < 1 | -  | -  | 36%   |
| <i>Elymus farctus</i> (Viv.) Runemark ex Melderis    | 6   | -   | -  | 91%   | <i>Scabiosa triandra</i> L.                               | < 1 | -  | -  | 55%   |
| <i>Equisetum ramosissimum</i> Desf.                  | 1   | -   | -  | 27%   | <i>Schoenus nigricans</i> L.                              | 1   | -  | -  | 9%    |
| <i>Erigeron canadensis</i> L.                        | 1   | -   | -  | 91%   | <i>Senecio inaequidens</i> DC.                            | < 1 | -  | -  | 9%    |
| <i>Eryngium maritimum</i> L.                         | 1   | -   | -  | 73%   | <i>Silene conica</i> L.                                   | < 1 | -  | -  | 27%   |
| <i>Eupatorium cannabinum</i> L.                      | < 1 | -   | -  | 9%    | <i>Silene italica</i> (L.) Pers.                          | < 1 | -  | -  | 45%   |
| <i>Festuca fasciculata</i> Forssk.                   | 1   | -   | -  | 73%   | <i>Silene otites</i> (L.) Wibel                           | 3   | -  | -  | 18%   |
| <i>Fumana procumbens</i> (Dunal) Gren. et Godr.      | 10  | -   | -  | 91%   | <i>Silene vulgaris</i> (Moench) Garcke                    | < 1 | -  | -  | 64%   |
| <i>Helianthemum nummularium</i> (L.) Mill.           | 1   | -   | -  | 9%    | <i>Sporobolus pumilus</i> (Roth) P.M. Peterson et Saarela | 43  | -  | -  | 100%  |
| <i>Hypochaeris radicata</i> L.                       | < 1 | -   | -  | 18%   | <i>Tamarix gallica</i> L.                                 | -   | 17 | -  | 27%   |
| <i>Juncus conglomeratus</i> L.                       | < 1 | -   | -  | 18%   | <i>Taraxacum officinale</i>                               | < 1 | -  | -  | 36%   |
| <i>Juniperus communis</i> L.                         | < 1 | -   | -  | 9%    | <i>Teucrium capitatum</i> L.                              | 1   | -  | -  | 18%   |
| <i>Lagurus ovatus</i> L.                             | 1   | -   | -  | 64%   | <i>Teucrium flavum</i> L.                                 | 2   | -  | -  | 27%   |
| <i>Ligustrum vulgare</i> L.                          | < 1 | -   | -  | 9%    | <i>Thymus longicaulis</i> C. Presl                        | 4   | -  | -  | 55%   |
| <i>Lomelosia argentea</i> (L.) Greuter et Burdet     | < 1 | -   | -  | 27%   | <i>Tragopogon dubius</i> Scop.                            | 2   | -  | -  | 9%    |
| <i>Malus domestica</i> Borkh.                        | < 1 | < 1 | -  | 9%    | <i>Tripidium ravennae</i> (L.) H. Scholz                  | -   | 4  | -  | 9%    |

**Table S2.** Results of correlation analysis. Numbers in bold represent significant correlations ( $p < 0.05$ ).

|                                 | B.s.        | H.c.        | L.          | N.a.s        | N.h.s        | N.n.s        | N.R.r.r      | N.s.s        | N.s.        | N.t.s       | P.p.c        | P.d.t.s      | R.r.m.<br>h. | R.r.c        | S.c.        | T.c.        | V.b.w        |
|---------------------------------|-------------|-------------|-------------|--------------|--------------|--------------|--------------|--------------|-------------|-------------|--------------|--------------|--------------|--------------|-------------|-------------|--------------|
| <b>Bare soil</b>                | 1.00        | 0.37        | 0.23        | <b>-0.37</b> | <b>-0.02</b> | 0.29         | <b>0.33</b>  | 0.47         | 0.07        | 0.59        | <b>0.10</b>  | <b>0.00</b>  | 0.00         | <b>0.68</b>  | <b>0.72</b> | 0.49        | <b>-0.11</b> |
| <b>Herbaceous cover</b>         | 0.37        | 1.00        | 0.48        | 0.23         | 0.11         | 0.05         | <b>0.63</b>  | 0.11         | 0.04        | 0.32        | 0.41         | 0.06         | -0.24        | <b>0.69</b>  | -0.18       | 0.38        | 0.18         |
| <b>Litter</b>                   | 0.23        | 0.48        | 1.00        | <b>0.46</b>  | <b>0.59</b>  | 0.47         | 0.05         | 0.47         | 0.49        | 0.45        | <b>0.60</b>  | 0.30         | 0.21         | 0.52         | 0.03        | <b>0.67</b> | <b>0.59</b>  |
| <b>N. alien species</b>         | -0.37       | 0.23        | <b>0.46</b> | 1.00         | <b>0.57</b>  | 0.08         | <b>-0.21</b> | -0.03        | 0.33        | 0.27        | <b>0.79</b>  | <b>0.53</b>  | <b>0.41</b>  | <b>0.00</b>  | -0.40       | <b>0.46</b> | <b>0.89</b>  |
| <b>N. herbaceous species</b>    | -0.02       | 0.11        | <b>0.59</b> | <b>0.57</b>  | 1.00         | <b>0.83</b>  | <b>-0.34</b> | 0.51         | <b>0.91</b> | 0.45        | 0.53         | <b>0.83</b>  | 0.26         | <b>0.11</b>  | -0.01       | <b>0.67</b> | <b>0.59</b>  |
| <b>N. native species</b>        | 0.29        | 0.05        | 0.47        | 0.08         | 0.83         | 1.00         | <b>-0.27</b> | <b>0.75</b>  | <b>0.95</b> | 0.46        | 0.11         | <b>0.71</b>  | -0.05        | 0.25         | 0.29        | 0.48        | 0.18         |
| <b>N. R. rugosa ramets</b>      | <b>0.33</b> | <b>0.63</b> | 0.05        | <b>-0.21</b> | <b>-0.34</b> | <b>-0.27</b> | 1.00         | -0.19        | -0.35       | -0.06       | 0.04         | <b>-0.35</b> | <b>-0.30</b> | <b>0.67</b>  | 0.17        | 0.03        | <b>-0.28</b> |
| <b>N. shrubby species</b>       | 0.47        | 0.11        | 0.47        | -0.03        | 0.51         | <b>0.75</b>  | -0.19        | 1.00         | <b>0.68</b> | 0.36        | <b>-0.05</b> | 0.44         | -0.09        | 0.50         | <b>0.51</b> | 0.29        | 0.13         |
| <b>N. species</b>               | 0.07        | 0.04        | 0.49        | 0.33         | <b>0.91</b>  | <b>0.95</b>  | <b>-0.35</b> | <b>0.68</b>  | 1.00        | 0.39        | 0.21         | <b>0.78</b>  | 0.01         | 0.17         | 0.14        | 0.46        | 0.37         |
| <b>N. tree species</b>          | 0.59        | 0.32        | 0.45        | 0.27         | 0.45         | 0.46         | -0.06        | 0.36         | 0.39        | 1.00        | 0.53         | <b>0.65</b>  | <b>0.52</b>  | 0.39         | 0.26        | <b>0.78</b> | <b>0.58</b>  |
| <b>Pinus pinea cover</b>        | <b>0.10</b> | 0.41        | <b>0.60</b> | <b>0.79</b>  | 0.53         | 0.11         | 0.04         | <b>-0.05</b> | 0.21        | 0.53        | 1.00         | 0.41         | <b>0.52</b>  | 0.24         | -0.12       | <b>0.83</b> | <b>0.79</b>  |
| <b>Plot distance to the sea</b> | <b>0.00</b> | 0.06        | 0.30        | <b>0.53</b>  | <b>0.83</b>  | <b>0.71</b>  | <b>-0.35</b> | 0.44         | <b>0.78</b> | <b>0.65</b> | 0.41         | 1.00         | 0.34         | <b>0.05</b>  | -0.05       | <b>0.54</b> | <b>0.60</b>  |
| <b>R. rugosa mean height</b>    | 0.00        | -0.24       | 0.21        | <b>0.41</b>  | 0.26         | -0.05        | <b>-0.30</b> | -0.09        | 0.01        | <b>0.52</b> | <b>0.52</b>  | 0.34         | 1.00         | <b>-0.08</b> | 0.12        | <b>0.54</b> | <b>0.70</b>  |
| <b>R. rugosa cover</b>          | <b>0.68</b> | <b>0.69</b> | 0.52        | <b>0.00</b>  | <b>0.11</b>  | 0.25         | <b>0.67</b>  | 0.50         | 0.17        | 0.39        | 0.24         | <b>0.05</b>  | <b>-0.08</b> | 1.00         | <b>0.53</b> | 0.43        | <b>0.13</b>  |
| <b>Shrub cover</b>              | <b>0.72</b> | -0.18       | 0.03        | <b>-0.40</b> | -0.01        | 0.29         | 0.17         | <b>0.51</b>  | 0.14        | 0.26        | <b>-0.12</b> | -0.05        | 0.12         | <b>0.53</b>  | 1.00        | 0.25        | <b>-0.15</b> |
| <b>Tree cover</b>               | 0.49        | 0.38        | <b>0.67</b> | <b>0.46</b>  | <b>0.67</b>  | 0.48         | 0.03         | 0.29         | 0.46        | <b>0.78</b> | <b>0.83</b>  | <b>0.54</b>  | <b>0.54</b>  | 0.43         | 0.25        | 1.00        | <b>0.65</b>  |
| <b>Vegetated belt width</b>     | -0.11       | 0.18        | <b>0.59</b> | <b>0.89</b>  | <b>0.59</b>  | 0.18         | <b>-0.28</b> | 0.13         | 0.37        | <b>0.58</b> | <b>0.79</b>  | <b>0.60</b>  | <b>0.70</b>  | <b>0.13</b>  | -0.15       | <b>0.65</b> | 1.00         |
